# Supplementary material for: Crowd signals: Early detection of disease outbreaks using real-time healthcare occupancy data
Source: Research Square preprint supplement (doi:10.21203/rs.3.rs-7754752/v1), 2025-10-31
Supplement: Supplementary file 1 [file 4fa023f71b3e977282909ea0.xlsx]

## Sheet: Granger Causality Test
Period	Diagnostic Test (State)	lag	p-value	virus
July–December 2023	DENV (Cases)	4	<0.001	DENV
July–December 2023	RV (Cases)	3	<0.001	RV
July–December 2023	SARS-CoV-2 (Cases)	3	0.01	SC2
July–December 2023	SARS-CoV-2 (Cases)	4	0.01	SC2
July–December 2023	RV (Cases)	4	0.02	RV
July–December 2023	RV (Cases)	2	0.02	RV
July–December 2023	RV (Positivity)	3	0.02	RV
July–December 2023	DENV (Cases)	5	0.02	DENV
July–December 2023	RV (Positivity)	4	0.04	RV
October 2023–June 2024	DENV (Positivity)	2	<0.001	DENV
October 2023–June 2024	DENV (Positivity)	1	<0.001	DENV
October 2023–June 2024	DENV (Positivity)	3	<0.001	DENV
October 2023–June 2024	DENV (Positivity)	4	<0.001	DENV
October 2023–June 2024	DENV (Positivity)	5	<0.001	DENV
June–October 2024	RV (Cases)	1	0.03	RV
June–October 2024	SARS-CoV-2 (Cases)	1	0.04	SC2
